# Supplementary material for: Radiative closure tests of collocated hyperspectral microwave and infrared radiometers
Source: Copernicus journal article supplement (doi:10.5194/amt-2023-215), 2023-11-10
Supplement: Supplementary file [file amt-2023-215-AC2-supplement.pdf]

The number of Lines in the comments corresponds to the original manuscript. The number of Lines in the responses (in red) corresponds to the revised manuscript with changes noted.

This paper conducts a radiative closure exercise, using radiosondes observations to drive radiative transfer models which are then compared against both ground-based mid-infrared observations from the AERI and both ground-based and airborne observations from the microwave instrument HiSRAMS. Closure is considered achieved if the difference between the observation and radiative transfer calculation is within the uncertainties of both. Three different field campaigns were conducted, which had varying temperature and humidity conditions. The results demonstrated that there are times when closure was achieved, and other times when it was not. The authors then demonstrated how to compare the two instruments' closure using optical depth, arguing that the AERI and HiSRAMS agree when the HiSRAMS was airborne and looking downward, but that they did not agree when the HiSRAMS was on the surface looking upward.

Generally speaking, these closure tests are highly needed and should be conducted before thermodynamic profiles are retrieved from them (which the authors indicated is future work), so I commend them for this. However, there are some details that are missing and some concerns I have that should be addressed before this paper could be considered for publication.

Thank you for your comments and feedback to help us improve our paper! We have addressed and answered each of your concerns and comments point by point, following each respective paragraph.

One of my primary concerns is that this entire paper is focused upon three campaigns, where each one had a single radiosonde launch (Table 1). Thus,  $N=3$ . While careful quality control and processing of the radiosonde data can be done, the sampling uncertainty is still quite large.

Thank you for pointing this out! The sampling size is one of the key considerations in our radiative closure studies. We are consistently striving to conduct more field campaigns to gather additional data, as we consider this a crucial method for verifying the radiometric accuracy of hyperspectral instruments. These closure studies represent a fundamental step in advancing further research applications involving hyperspectral measurements.

During the three field campaigns we conducted, we observed persistent spectral features in the radiance differences between LBLRTM simulations and AERI observations. Considering the temporal gap between these campaigns, we believe that the spectral features are real. For these campaigns, the bias mean significantly exceeds the bias standard deviation illustrated in Figure 7a of the manuscript.

In Figure R1, we present the confidence level associated with each AERI channel. Across many channels, the sigma level exceeds 4, indicating a 99.9937% likelihood that the bias mean exceeds the bias standard deviation for these three field campaigns. We added the discussions in Lines 275-277.

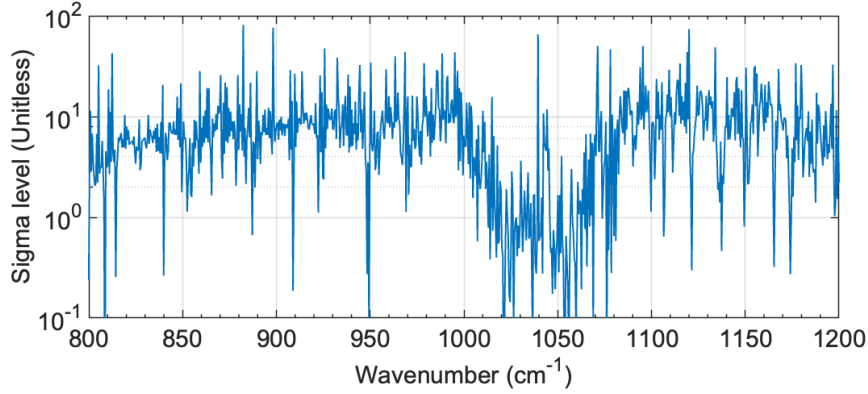

Figure R1. The sigma level at each AERI channel in the window band (800-1200  $\text{cm}^{-1}$ ).

Another is that radiosondes, by their nature and how they are calibrated at the factory, have both systematic and random errors combined together when providing their uncertainty values (which the authors reported on line 86-88). Later, they tried to estimate the forward calculation uncertainty by Monte Carlo sampling the radiosonde data (line 225), attributing all of the uncertainties to random errors; it is not surprising to me that this did not result in much spread. I would highly recommend the authors consider apportioning the stated uncertainties into random and systematic errors as was done in Blumberg et al. JAMC 2017 (in the appendix), as correlated error will lead to larger impacts on the radiative transfer calculations.

Thank you for recommending this method! Following the instructions outlined in Blumberg et al. (2017), we have accounted for both the repeatability and reproducibility errors of the iMet-4 radiosondes utilized in this study:

repeatability errors (random errors):

$$\sigma_{T,radiosonde\ repeatability} = 0.2K, \quad \sigma_{RH,radiosonde\ repeatability} = 5\%$$

reproducibility errors (systematic errors):

$$\sigma_{T(P>100hPa),radiosonde\ repeatability} = 0.3K, \quad \sigma_{T(P<100hPa),radiosonde\ repeatability} = 0.75K,$$

$$\sigma_{RH(T>0C),radiosonde\ repeatability} = 3\%, \quad \sigma_{RH(-40C<T<0C),radiosonde\ repeatability} = 5\%.$$

We have incorporated the spatial variability from ERA5 into the total random errors. An 8x8 grid box containing the trajectory of each balloon is considered to calculate the spatial variability, as suggested in the comment, to account for the smoothing impact in models. Thus:

$$\sigma_{T,random} = \sqrt{\sigma_{T,ERA5}^2 + \sigma_{T,radiosonde\ repeatability}^2}$$

$$\sigma_{RH,random} = \sqrt{\sigma_{RH,ERA5}^2 + \sigma_{RH,radiosonde\ repeatability}^2}$$

Following the procedures mentioned in Blumberg et al. (2017), the radiative closure results for AERI are shown in Figure R2. The radiance biases for all three field campaigns in the window band still exceed the total uncertainties at the 99.73% significance level.

According to the newly prescribed simulation uncertainty, we have identified a relatively broad uncertainty range in the temperature-sensitive channels ( $\text{CO}_2$  absorption band centered at  $667 \text{ cm}^{-1}$  and water vapor absorption band between  $1400$  and  $1800 \text{ cm}^{-1}$ ). This implies that the radiative closure could be achieved in a wider range of the input variables.

We have updated the Figure 6 in the manuscript, the description of the input uncertainty in the manuscript (Lines 87-92, Lines 108-111), and the description of the AERI radiative closure results in Lines 262-264.

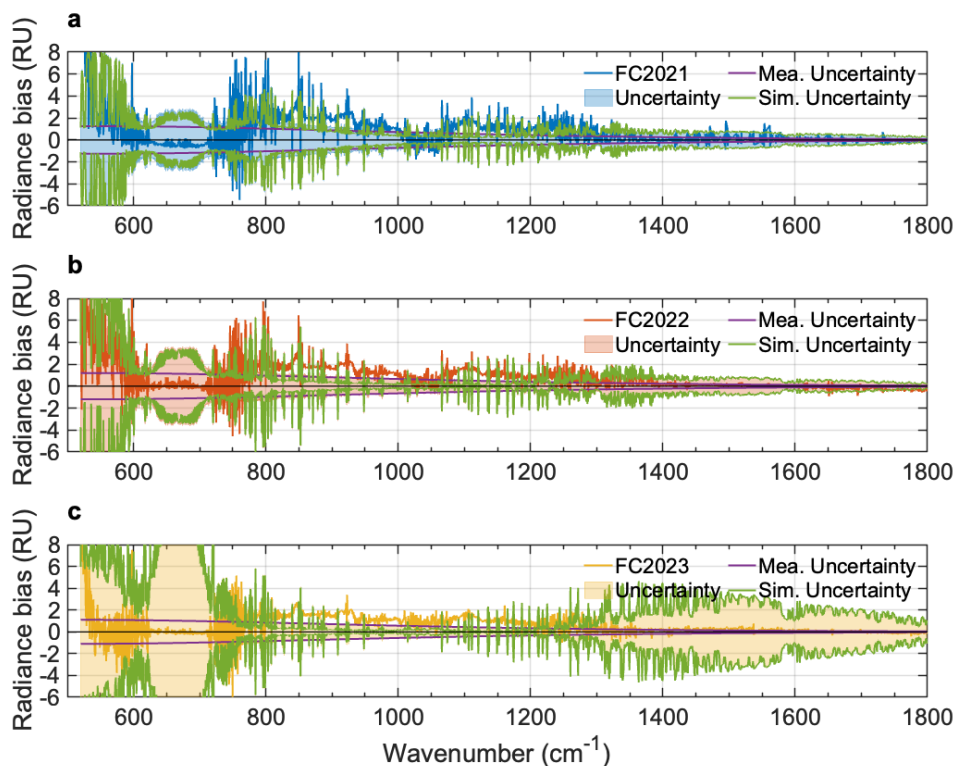

Figure R2: AERI radiative closure test results with updated simulation uncertainty. Here, the simulation uncertainty includes the random uncertainty from radiosonde measurements (repeatability errors) and enlarged spatial variability from ERA5 and the systematic uncertainty from radiosonde measurements (reproducibility errors).

The authors have identified an apparent bias in the infrared window channels of the AERI. I recommend they also read/reference the paper by Delamere et al. JGR 2010, which also noted a similar sized bias and did some exploratory work to understand it (albeit to no avail). One mechanism the authors should consider is that the MCT detector used in the AERI has a non-linearity correction applied, and perhaps this correction being applied is not correct.

Thank you for your comments regarding the warm bias detected in AERI observations within the window band! Previously, we referenced the paper by Delamere et al. (2010) solely in discussing the necessity of radiative closure tests (Line 64). We have included the reference of this paper when discussing the warm bias identified elsewhere in Line 286.

The AERI-122, i.e. the AERI utilized in this study, meets the nonlinearity requirement based on the third blackbody test cooled by liquid nitrogen, conducted as part of its certification testing at the University of Wisconsin Space Science Engineering Center in Madison, Wisconsin in November 2020. Additionally, we performed a third blackbody at ambient temperature calibration experiment and a FOV mapping experiment in August 2021, and AERI-122 successfully passed all tests. To further verify the stability of the instrument, future work of a third blackbody test cooled by liquid nitrogen is warranted to better address and constrain this issue. We specify the non-linearity-induced inaccuracy when addressing the persistent warm bias in the window band in Line 291.

More importantly, however, is that this apparent calibration error likely changes magnitude based upon the scene temperature; subtracting a bias offset is not appropriate for all scenes. A radiometric error is almost certainly associated with the slope relating detected signals to radiance (i.e., which is determined by the blackbody views), and as these are very cold scenes a small error in the slope will become larger as the sky temperature becomes colder (i.e., farther away from the ambient blackbody temperature). Thus, subtracting a bias only works for these cases, where the bias was determined directly from the radiosondes and the associated forward calculation, and is not something “easily removed” as suggested on line 270.

Thank for pointing out the subjective wording used in the manuscript. We aim to clarify that the magnitude of the radiance bias remains consistent across three distinct field campaigns. We have revised the manuscript to ensure objective language throughout.

Figure 10 and text around line 333: I am not convinced by the discussion associated with the bias seen in leg 1 on this flight. The environment at 6.8 km (leg 1) is colder than at 5.3 km (leg 2), but leg 3 at 4.3 km is also colder – yet the bias between legs 2 and leg 3 are very similar whereas the bias in leg 1 is a clear outlier. I believe something else is likely the problem, and that you should not try to simply state (as on line 333) that the issue “may be due to poor calibration in a cold environment.”

We completely agree with your explanation regarding the cause of the bias in leg 1. We have revised the sentence in Lines 362-363. The reason we believe that the poor radiative closure for leg 1 could be attributed to poor calibration accuracy is that the brightness temperature observed at leg 1 is relatively lower compared to other legs (Figure 5c in the manuscript). This indicates that the scene temperature is relatively further from both the warm target temperature and ambient target temperature, potentially resulting in increased calibration error, such as non-linearity-induced inaccuracies. It emphasizes the necessity for further instrument improvement, which includes conducting a liquid nitrogen calibration experiment to identify the issue and potentially enhance the instrument’s accuracy.

However, we are not sure whether this calibration issue alone could fully explain why leg 1 presents divergent radiative closure result. Considering the absolute outlier status of leg 1 in radiative closure, we would greatly appreciate any insights or possible explanations regarding the large bias observed in leg 1.

The comparison of the two instruments using optical depth is interesting. However, there are many trace gases that will be impacting the downwelling radiance observed by the AERI. Indeed, I can see in Figure 3 spectral structure associated with CFCs, which the authors indicated are not included in their downwelling calculations. I would highly recommend that the authors only use spectral channels from the AERI that are associated only with water vapor and carbon dioxide; spectral elements that have a contribution from other gases (CFCs, O<sub>3</sub>, CH<sub>4</sub>, N<sub>2</sub>O) should not be used in their optical depth plots. I suspect that it won't change the results too much, but makes the messaging much cleaner.

Thank you for the suggestion! We obtained the total optical depth at each AERI channels contributed by various greenhouse gases (H<sub>2</sub>O, CO<sub>2</sub>, O<sub>3</sub>, CH<sub>4</sub>, N<sub>2</sub>O, and CFCs) based on FC2023 data. Each channel is labeled based on the variable contributing the most to the total column optical depth (Figure R3; see Section 2 in the Supplement document). This result has been included in the published netCDF file named "radiative\_closure\_tests\_AERI.nc" (<https://data.mendeley.com/datasets/kvt2s9ryk7>).

Utilizing this channel selection index, we have updated Figures 13 and 14 by exclusively incorporating the channels labeled as water vapor and carbon dioxide for AERI measurements. Furthermore, in response to Reviewer 1's comment, we have also included the mean and standard deviation of BT biases in Figure 13. There are no significant differences between the old and updated versions of Figures 13 and 14.

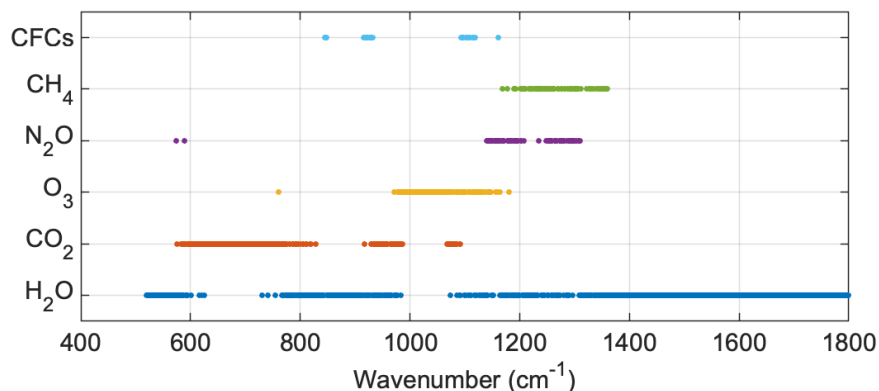

Figure R3. AERI channel labels. Each AERI channel is labeled as the greenhouse gas who contributes the most to the total column optical depth.

Another large concern I have is associated with the surface contributions to the HiSRAMS observations when the radiometer is aloft and looking downward. You indicated that you are using the lowest flight level to effectively constrain the emission from the surface with observations; however, this was not discussed in any detail and thus we don't know if the effective skin temperature is realistic or not, and similar for the surface emissivity. This should be discussed in more detail.

We have provided detailed discussions on how we established the boundary conditions for HiSRAMS's nadir-pointing simulations in Lines 221-223. Microwave emissivity models require the input of a large number of surface parameters, such as surface type, soil moisture, vegetation characteristics, and surface roughness. Therefore, it requires an accurate surface property

database. To bypass that and to avoid the impact of the uncertainties in the surface emissivity, we decided to designate the nadir-pointing observations from the lowest flight level as the elevated surface, serving as the boundary constrain for other nadir-pointing observations.

This elevated surface emission already combines both the actual surface contribution and the atmospheric contribution between the real surface and this elevated surface. In other words, we consider the radiance observations from HiSRAMS at the lowest level as the “surface emission” at the elevated surface, already reflecting the effective skin temperature at this designated level.

Furthermore, you pointed out that the nadir-pointing HiSRAMS seems to agree well with the AERI but that the zenith pointing HiSRAMS does not. How much is the former results due to the way that the surface was constrained in the forward calculations? And in optically thin channels (e.g., 52-54 GHz), most of the observed radiance when airborne will be from the surface, and so are you really able to extract out the atmospheric optical depth well? What are uncertainties here?

The treatment of the surface contribution reduces the BT biases between nadir-pointing measurement and simulations, potentially leading to better radiative closure. At present, we are unable to quantify the exact impact of the boundary condition setting on radiative closure results for nadir-pointing measurements. Instead, we have included this discussion in the manuscript (Lines 387-389).

For HiSRAMS, the optical depth is derived from gas absorption coefficients parameterization for water vapor, oxygen, ozone, and nitrogen from Rosenkranz (2018, Rosenkranz, P.W.: Line-by-line microwave radiative transfer (non-scattering), Remote Sens. Code Library, doi:10.21982/M81013, 2017).

Minor details:

The authors need to mention the location of the intercomparison in the abstract and the paper.

Thank you for the reminder! We relocated the field campaign location details from Line 110 to Lines 70-71 in the manuscript. Additionally, we included the location description in the abstract (Line 15).

Line 102: using 9 adjacent gridboxes (i.e., a 3x3 grid around the desired point) in a model is not a good measure of the heterogeneity of a region, as virtually all models are diffusive and thus there will be a reasonable amount of correlation associated with model smoothing. Most models have significant model-induced correlations out to 5 times to 8 times the horizontal model grid spacing.

Thank you for pointing this out! We now use a 8x8 grid containing the trajectory of each balloon to calculate the spatial variability. The results of this analysis are presented in the previous discussion concerning the radiosonde measurement uncertainties. The new treatment of the spatial variability is includes in Lines 108-111.

Figure 6: it does not seem that the uncertainties from the observations and simulations are being combined properly in quadrature to get the total uncertainty. For example: Fig 6a at 850 cm<sup>-1</sup> looks like the total uncertainty is the same as the measurement uncertainty; but as the simulated uncertainty is the same magnitude, the total uncertainty should be larger.

This is because the different elements in the figures are overlapping with each other. The enlarged figure (Figure R4) indeed shows that the total uncertainty in Figure 6a is larger than both the measurement uncertainty and the simulation uncertainty.

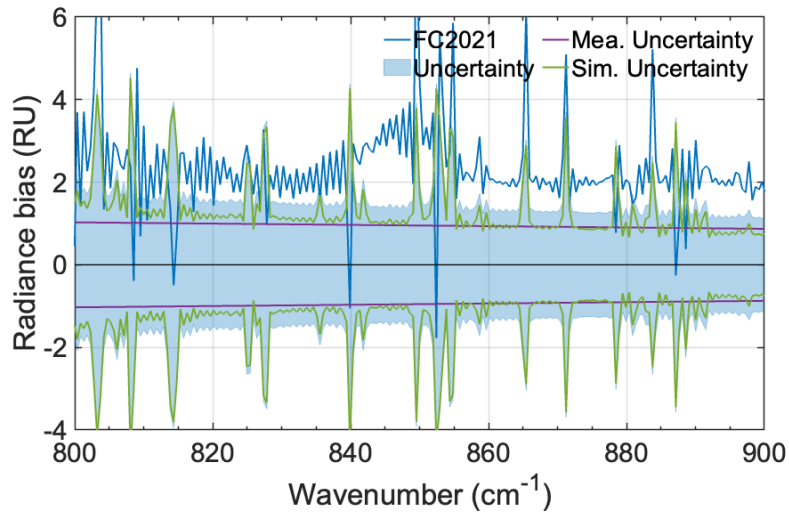

Figure R4. The AERI radiative closure results for FC2021 between 800 and 900 cm<sup>-1</sup>.

Line 299: I think this phrasing for this sentence sounds better: “The primary contribution to the radiative closure uncertainty in the zenith...”

We have rephrased the sentence in Lines 326-327.

Line 315: this sentence seems very obvious.

We have deleted the sentence in Lines 345-346.

Fig 13c: please explain the second cloud of points here (which has a bias of -3 to -8 K)?

The second cluster of points in Figure 13c with a bias of -3 to -9 K corresponds to leg 1, where a relatively larger BT bias is observed.

## References

- Blumberg, W., Wagner, T., Turner, D., & Correia, J. (2017). Quantifying the accuracy and uncertainty of diurnal thermodynamic profiles and convection indices derived from the Atmospheric Emitted Radiance Interferometer. *Journal of Applied Meteorology and Climatology*, 56(10), 2747-2766.
- Delamere, J., Clough, S., Payne, V., Mlawer, E., Turner, D., & Gamache, R. (2010). A far-infrared radiative closure study in the Arctic: Application to water vapor. *Journal of Geophysical Research: Atmospheres*, 115(D17).
